# Supplementary material
Source: Research Square preprint supplement (doi:10.21203/rs.3.rs-9020027/v1)
Supplement: Supplementary file 1 [file 7acff53149b3c1aeeffcd82f.docx]

Coding Framework

| ***Theme*** | ***Sub themes*** | ***Category*** | ***Codes*** | ***Description*** |
| --- | --- | --- | --- | --- |
| ***Existing challenges*** | Significant rapid weight gain  ETI exacerbating an increasing prevalence of overweight and obesity.  Weight gain with introduction of ETI during covid 19 pandemic  Uncertainties about future health implications of overweight and obesity | Physical impact on patients  Uncertainties | - a significant rapid change in weight - Kaftrio exacerbating an existing issue - weight gain with Kaftrio and covid - burden of additional diet and physical activity treatments | Observing patients gaining 2-3 stones on weight over a few months. Whilst patient were shielding and less active at home. Unable to be monitored face to face. Dietitians expressing that they were already dealing with more overweight and obesity prior to ETI.  Hesitancy to deal with weight management when patients perceived to be reluctant to make changes and limited evidence of risk/ benefit to being overweight /obese for pwCF |
| ***Generalist vs Specialist*** | Impact on clinical practice  Transferable Roles and Skills within the CF MDT for weight management | Physical impact on patients  Uncertainties  Established CF MDT roles and skills for delivering weight management and behaviour change  Existing CF MDT ways of working transferable to weight management | - new weight related comorbidities and clinical issues - adjusting to new diet and physical activity needs - uncertain boundaries of CF specialised care - professional roles ( nurse, doctor, dietitian, physio, psychologist) - dietitians have the skill set needed for weight management - physios have the exercise skills - supporting role of the CF MDT - working together as a team - dietitians and Physio working together - working with psychology | CF MDT dealing with new clinical issues as a result of weight gain and modulator therapies - more pregnancies, more complex diabetes, more MSK issues, more high cholesterol levels, disordered eating.  Uncertain if should upskill to manage these issues in specialist centre or refer to other services and primary care.  Maintaining professional role boundaries  Dietitian and physios had skill set for weight management, MDT approach transferable  Social support for patients  Established MDT collaborative working transferable to weight management  Joint consultations to prevent patients repeating the same information  Working with psychology on disordered eating and body image issues with patients |
| ***Relationships and roles*** | Valued long-term relationships with patients.  Reluctance to risk upsetting patient relationships  Tentative Weight Management Conversations  Hesitance to add to the patient’s treatment burden.  Preserving professional boundaries and MDT relationships | Relationships with patients  Hesitancies | - Trusted Relationships - Concerns about upsetting patients and long-term relationship - tentative approaches to bringing up weight management conversations - How do you feel about your weight ? - Concerns about increasing the treatment burden with additional diet and PA advice - Dietetic leading on weight management | Long standing relationship with patients due to regional service delivery.  Hesitancy to disrupt this relationship by raising weight management driven by fear of upsetting patients and adding to their high treatment burden.  CF Team roles being preserved despite changes in patient needs and shifting of responsibility regarding weight management to dietitians primarily |
| ***Model of care*** | Limitations to delivery of behaviour change  Limited access to CF‑appropriate weight management and exercise services  Flexible access to the CF MDT and weight management choices  Developing services, roles and skills to meet changing patient needs  Future uncertainties of a CF specialised service | Challenges to behaviour change delivery  Personalisation  Adapting the service to future Service  new skills and evolving roles  service threats | - service capacity limitations - not having the time for behaviour change therapy in MDT clinics - limited access to weight management and exercise options to meet needs of PwCF and individual preferences - New approaches to delivering diet and physical activity behaviour change - changing and emerging roles new MDT roles - acquiring a new skill set - threat to the work force - uncertain boundaries of CF specialised care | Limited access to weight management programmes and exercise programmes that meet the needs of pwCF. Not adequate time in busy MDT clinics to deliver behaviour change due to competing demands and prioritising other clinical issues such as diabetes, PERT over weight management.  Patients needing individualised approach and CF services able to deliver this will rapid and flexible access.  Developing dietetic and physio led clinics outside of MDT clinics to deliver weight management and exercise advice  Recognition that referral pathways to eating disorder services, MSK services need to be developed or upskill the team to provide these in specialist care  Experience of management reviewing funding needs as patients in better health and work force feeling under threat |
| ***Normalising amid uncertainty*** | Navigating the shift from dependency to self-management  Normalising overweight and obesity in context on non-CF population  Social media influences  Limited evidence and guidance for clinical practice | Adjusting to a changed identity  similar experiences, barriers and motivations to behaviour change as non-CF population  Environmental and financial barriers to behaviour change  Uncertainties | - PwCF adjusting to changed health and life expectancy - New diet and physical activity needs - Maintaining the sick role - Weather and economic barriers to exercise and healthy eating - Unhappy with weight gain and body image - Wanting to attain a socially desirable body image - Limited evidence for future co-morbidities in PwCF | Patients still adjusting to improved health and life expectancy  No longer special and adjusting to better health  High prevalence of overweight and obesity in UK and PwCF exposure to same socioeconomic influences and food environment  Some patients unhappy with weight gain as previously able to maintain a socially desirable and lower BMI  Social media driving want to change body image and be thinner , men and women subject to same social media influences. Some men wanting to bulk up more  limited evidence of risk/ benefit to being overweight /obese for pwCF |
