# Supplementary material
Source: Research Square preprint supplement (doi:10.21203/rs.3.rs-9020027/v1)
Supplement: Supplementary file 2 [file ce1731fa09ba94890c893d33.pdf]

**Navigating Change – UK specialised adult cystic fibrosis service delivery in the highly effective modulator therapy era Focus Group Interview Schedule**

**Interview Schedule**

**Aim; to explore CF HCP experience of providing weight management advice to adults with CF who are overweight/obese and treated with CFTR modulator therapies and the barriers and facilitators they experience in supporting patients to engage in diet and physical activity behaviour change.**

| <b>Topic</b>                                       | <b>Questions</b>                                                                                                                                                                                                                                            | <b>Potential follow up questions/probes</b>                                                                                                                                                |
|----------------------------------------------------|-------------------------------------------------------------------------------------------------------------------------------------------------------------------------------------------------------------------------------------------------------------|--------------------------------------------------------------------------------------------------------------------------------------------------------------------------------------------|
| <b>Welcome/Introductions</b>                       | <p>Thank you for attending</p> <p>Introduce JB and AT</p> <p>Purpose of focus group</p> <p>Focus group ground rules</p>                                                                                                                                     |                                                                                                                                                                                            |
| <b>Introductory Questions</b>                      | <p>Many adult CF centres have observed an increasing number of patients becoming overweight/obese, particularly since the introduction of Kaftrio.</p> <p>Can you tell me about your experience of managing patients with CF who are overweight /obese?</p> | <p>How do you approach conversations about weight management ?</p> <p>What triggers the conversation?</p> <p>What makes it difficult/easier to bring up in conversation with patients?</p> |
|                                                    | <b>How do you support patients who are overweight/obese manage their weight?</b>                                                                                                                                                                            |                                                                                                                                                                                            |
|                                                    | <b>What helps you to support them?</b>                                                                                                                                                                                                                      | <b>How does it help?</b>                                                                                                                                                                   |
|                                                    | <b>What have some of the challenges been?</b>                                                                                                                                                                                                               | <b>Why? How have you tried to overcome these challenges?</b>                                                                                                                               |
| <b>Diet and Physical Activity behaviour change</b> | <b>What has been your experience of advising patients to make changes to their diet? and physical activity?</b>                                                                                                                                             |                                                                                                                                                                                            |
|                                                    | <b>What has worked well/ not so well?</b>                                                                                                                                                                                                                   | <b>What are you aiming to achieve with the changes?</b>                                                                                                                                    |
|                                                    |                                                                                                                                                                                                                                                             | <b>Why?</b>                                                                                                                                                                                |
| <b>Clinical Practice</b>                           | <b>What would help you manage these patients in your clinical practice?</b>                                                                                                                                                                                 |                                                                                                                                                                                            |

**Navigating Change – UK specialised adult cystic fibrosis service delivery in the highly effective modulator therapy era Focus Group Interview Schedule**

|                                            |                                                                                                                                                          |  |
|--------------------------------------------|----------------------------------------------------------------------------------------------------------------------------------------------------------|--|
| <b>Summary<br/>Conclusions/Reflections</b> | <b>In Summary ..... is this an adequate summary, does it capture what was said here? are there any important aspects/issues we haven't talked about?</b> |  |
|--------------------------------------------|----------------------------------------------------------------------------------------------------------------------------------------------------------|--|
